# Supplementary material for: Chronic pregabalin treatment protects against spreading depolarization and alters hippocampal synaptic characteristics in a model of familial hemiplegic migraine-type 1
Source: PubMed Central journal article supplement (PMC10623724; doi:10.1186/s13041-023-01062-6), 2023-11-03
Supplement: 13041_2023_1062_MOESM1_ESM.pdf [file 13041_2023_1062_MOESM1_ESM.pdf]

## Figure S1

### Sample Current Clamp Recording

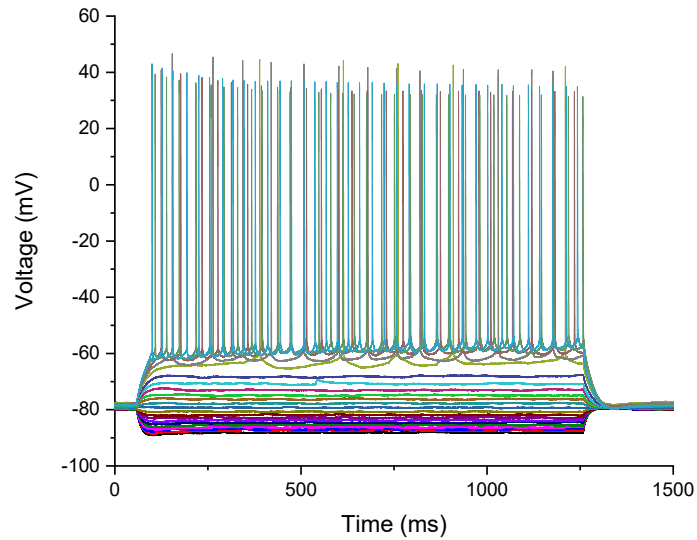

### Sample Voltage Clamp Recording of sEPSCs

WT (Control)

WT (Chronic PGB)

S218L

S218L (Chronic PGB)

20 pA  
200 ms

**Figure S1.** Representative whole-cell patch-clamp recordings from CA1 neurons in acute brain slices. **Left.** Representative current clamp recording showing response to 10 pA stepwise current injection. **Right.** Representative voltage clamp recordings of spontaneous excitatory postsynaptic currents (sEPSCs).
